# Supplementary material for: Mono- and bimetallic Ir(iii) based catalysts for the homogeneous photocatalytic reduction of CO2under visible light irradiation. New insights into catalyst deactivation
Source: Royal Society of Chemistry journal article supplement (doi:10.1039/c4dt01717j), 2014-07-22
Supplement: c4dt01717j1.pdf [file c4dt01717j1.pdf]

Supporting Information Dalton Trans.

# **Mono- and bimetallic Ir(III) based catalysts for the homogeneous photocatalytic reduction of CO<sub>2</sub> under visible light irradiation. New Insights regarding catalyst deactivation.**

Richard O. Reithmeier,<sup>a</sup> Simon Meister,<sup>a</sup> Bernhard Rieger,<sup>\*a</sup> Armin Siebel,<sup>b</sup> Martin Tschurl,<sup>c</sup> Ulrich Heiz<sup>c</sup> and Eberhardt Herdtweck<sup>d</sup>

<sup>a</sup> WACKER-Chair of Macromolecular Chemistry, Technische Universität München, Lichtenbergstr. 4, 85748 Garching, Germany, phone: (+)49 89 289 13571, fax: (+)49 89 289 13562; e-mail: [rieger@tum.de](mailto:rieger@tum.de)

<sup>b</sup> Department of Technical Electrochemistry, Technische Universität München, Lichtenbergstr. 4, 85748 Garching, Germany.

<sup>c</sup> Chair of Physical Chemistry, Technische Universität München, Lichtenbergstr. 4, 85748 Garching, Germany.

<sup>d</sup> Chair of Inorganic Chemistry/Molecular Catalysis, Technische Universität München, Lichtenbergstr. 4, 85748 Garching, Germany.

## **Table of Contents**

|                                               |   |
|-----------------------------------------------|---|
| 1. Detailed Crystallographic Information..... | 2 |
| 2. Irradiation Setup .....                    | 5 |

## 1. Detailed Crystallographic Information

### Single Crystal X-Ray Structure Determination of Compound 1 (CCDC 982397).

#### **General:**

Data were collected on an X-ray single crystal diffractometer equipped with a CCD detector (APEX II,  $\kappa$ -CCD) at the window of a fine-focused sealed tube with MoK $_{\alpha}$  radiation ( $\lambda = 0.71073$  Å) and a graphite monochromator by using the SMART software package.<sup>[1]</sup> The measurement was performed on a single crystal coated with perfluorinated ether. The crystal was fixed on the top of a cactus prickly (Opuntia ficus-india) and transferred to the diffractometer. The crystal was frozen under a stream of cold nitrogen. A matrix scan was used to determine the initial lattice parameters. Reflections were merged and corrected for Lorentz and polarization effects, scan speed, and background using SAINT.<sup>[2]</sup> Absorption corrections, including odd and even ordered spherical harmonics were performed using SADABS.<sup>[2]</sup> Space group assignments were based upon systematic absences, *E* statistics, and successful refinement of the structures. Structures were solved by direct methods with the aid of successive difference Fourier maps, and were refined against all data using WinGX<sup>[7]</sup> based on SIR-92<sup>[3]</sup> in conjunction with SHELXL-97<sup>[5]</sup>. Unless otherwise noticed, methyl hydrogen atoms were refined as part of rigid rotating groups, with a C–H distance of 0.98 Å and  $U_{\text{iso(H)}} = 1.5 \cdot U_{\text{eq(C)}}$ . Other H atoms were placed in calculated positions and refined using a riding model, with aromatic C–H distances of 0.95 Å, and  $U_{\text{iso(H)}} = 1.2 \cdot U_{\text{eq(C)}}$ . If not mentioned otherwise, non-hydrogen atoms were refined with anisotropic displacement parameters. Full-matrix least-squares refinements were carried out by minimizing  $\sum w(F_o^2 - F_c^2)^2$  with SHELXL-97<sup>[5]</sup> weighting scheme. Neutral atom scattering factors for all atoms and anomalous dispersion corrections for the non-hydrogen atoms were taken from *International Tables for Crystallography*.<sup>[4]</sup> Images of the crystal structures were generated by PLATON.<sup>[6]</sup>

#### **Special:**

**1:** Full refinement was possible without running into problems.

## Compound 1

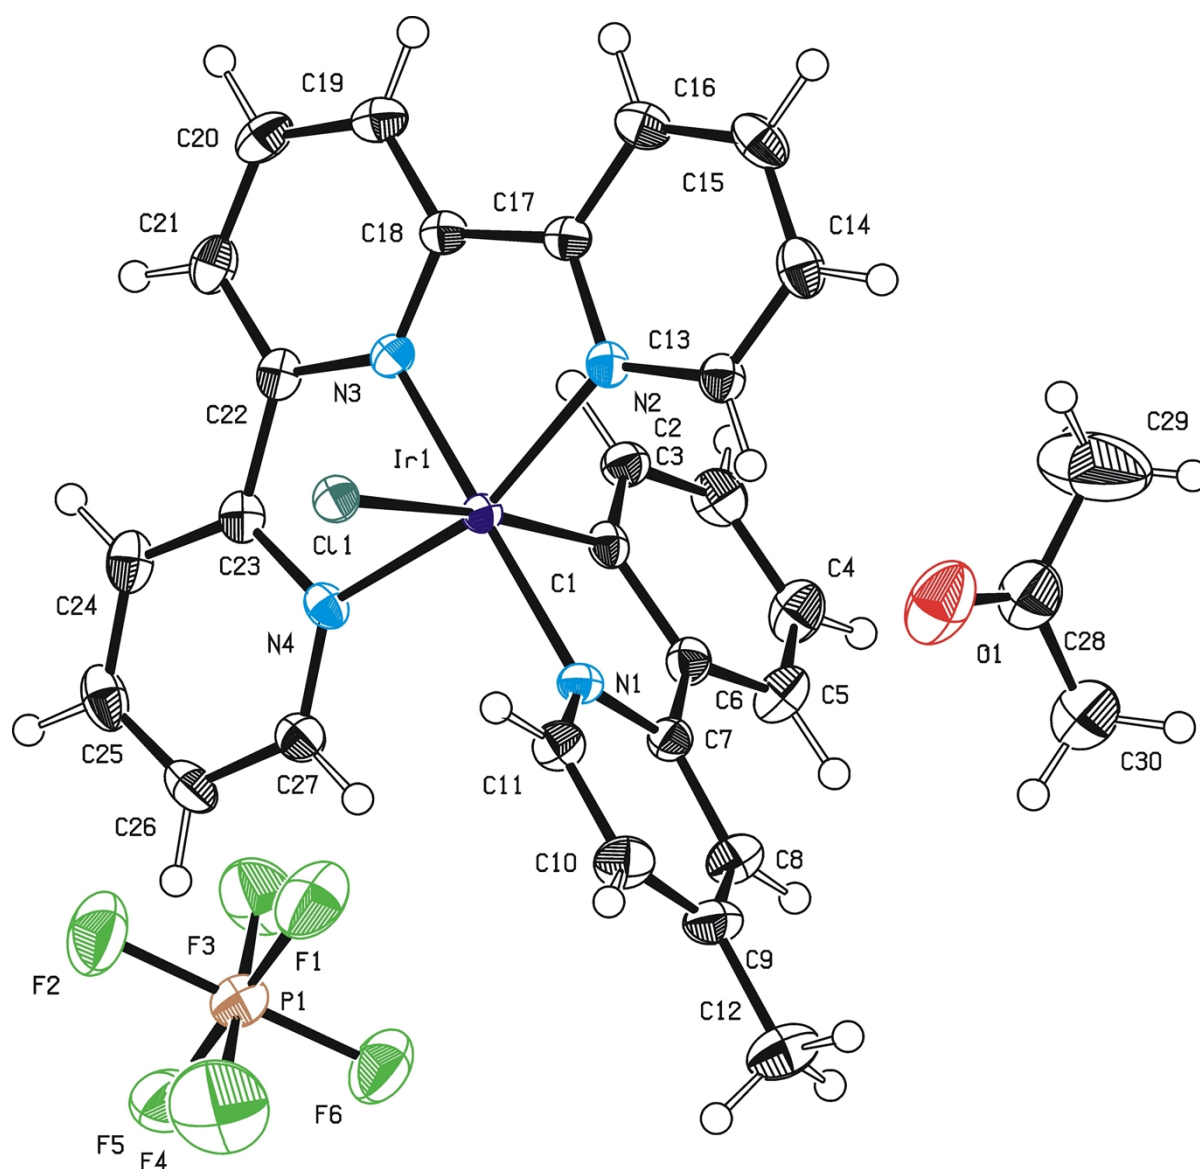

**Fig. S1** – Ortep drawing with 50% ellipsoids for complex **1**.<sup>[6]</sup>

|                       |                                                                                                                                                                                                                            |
|-----------------------|----------------------------------------------------------------------------------------------------------------------------------------------------------------------------------------------------------------------------|
| Operator:             | *** Herdtweck ***                                                                                                                                                                                                          |
| Molecular Formula:    | C <sub>30</sub> H <sub>27</sub> Cl F <sub>6</sub> Ir N <sub>4</sub> O P<br>[(C <sub>27</sub> H <sub>21</sub> Cl Ir N <sub>4</sub> ) <sup>+</sup> ], [(P F <sub>6</sub> ) <sup>-</sup> ], (C <sub>3</sub> H <sub>6</sub> O) |
| Crystal Color / Shape | Red plate                                                                                                                                                                                                                  |
| Crystal Size          | Approximate size of crystal fragment used for data collection:<br>0.05 × 0.18 × 0.25 mm                                                                                                                                    |
| Molecular Weight:     | 832.20 a.m.u.                                                                                                                                                                                                              |
| F <sub>000</sub> :    | 1624                                                                                                                                                                                                                       |
| Systematic Absences:  | h0l: h+l≠2n; 0k0: k≠2n                                                                                                                                                                                                     |
| Space Group:          | Monoclinic <i>P</i> 2 <sub>1</sub> /n (I.T.-No.: 14)                                                                                                                                                                       |
| Cell Constants:       | Least-squares refinement of 9872 reflections with the programs<br>"APEX suite" and "SAINT" [1,2]; theta range 1.75° < θ < 25.47°;<br>Mo(Kα); λ = 0.71073 Å<br>a = 8.4917(2) Å                                              |

|                                   |                                                                                                                                                                                                                                                                                                                                                                                                                                                                                                          |                                                                                                  |                           |               |
|-----------------------------------|----------------------------------------------------------------------------------------------------------------------------------------------------------------------------------------------------------------------------------------------------------------------------------------------------------------------------------------------------------------------------------------------------------------------------------------------------------------------------------------------------------|--------------------------------------------------------------------------------------------------|---------------------------|---------------|
|                                   | $b =$                                                                                                                                                                                                                                                                                                                                                                                                                                                                                                    | 27.4235(7) Å                                                                                     | $\beta =$                 | 100.8879(10)° |
|                                   | $c =$                                                                                                                                                                                                                                                                                                                                                                                                                                                                                                    | 13.0479(3) Å                                                                                     |                           |               |
|                                   | $V =$                                                                                                                                                                                                                                                                                                                                                                                                                                                                                                    | 2983.80(12) Å <sup>3</sup> ; $Z = 4$ ; $D_{\text{calc}} = 1.852 \text{ g cm}^{-3}$ ; Mos. = 0.53 |                           |               |
| Diffractometer:                   | Kappa APEX II (Area Diffraction System; BRUKER AXS); sealed tube; graphite monochromator; 50 kV; 30 mA; $\lambda = 0.71073 \text{ Å}$ ; Mo(K $\alpha$ )                                                                                                                                                                                                                                                                                                                                                  |                                                                                                  |                           |               |
| Temperature:                      | (-150±1) °C; (123±1) K                                                                                                                                                                                                                                                                                                                                                                                                                                                                                   |                                                                                                  |                           |               |
| Measurement Range:                | $1.75^\circ < \theta < 25.47^\circ$ ; h: -10/10, k: -33/33, l: -15/15                                                                                                                                                                                                                                                                                                                                                                                                                                    |                                                                                                  |                           |               |
| Measurement Time:                 | $2 \times 15 \text{ s per film}$                                                                                                                                                                                                                                                                                                                                                                                                                                                                         |                                                                                                  |                           |               |
| Measurement Mode:                 | measured: 7 runs; 2641 films / scaled: 7 runs; 2641 films<br>$\varphi$ - and $\omega$ -movement; Increment: $\Delta\varphi/\Delta\omega = 0.50^\circ$ ; dx = 40.0 mm                                                                                                                                                                                                                                                                                                                                     |                                                                                                  |                           |               |
| LP - Correction:                  | Yes [2]                                                                                                                                                                                                                                                                                                                                                                                                                                                                                                  |                                                                                                  |                           |               |
| Intensity Correction              | No/Yes; during scaling [2]                                                                                                                                                                                                                                                                                                                                                                                                                                                                               |                                                                                                  |                           |               |
| Absorption Correction:            | Multi-scan; during scaling; $\mu = 4.688 \text{ mm}^{-1}$ [2]                                                                                                                                                                                                                                                                                                                                                                                                                                            |                                                                                                  |                           |               |
|                                   | Correction Factors:                                                                                                                                                                                                                                                                                                                                                                                                                                                                                      | $T_{\text{min}} = 0.5634$                                                                        | $T_{\text{max}} = 0.7452$ |               |
| Reflection Data:                  | 70305                                                                                                                                                                                                                                                                                                                                                                                                                                                                                                    | reflections were integrated and scaled                                                           |                           |               |
|                                   | 1066                                                                                                                                                                                                                                                                                                                                                                                                                                                                                                     | reflections systematic absent and rejected                                                       |                           |               |
|                                   | 11                                                                                                                                                                                                                                                                                                                                                                                                                                                                                                       | obvious wrong intensity and rejected (0 2 0)                                                     |                           |               |
|                                   | 69228                                                                                                                                                                                                                                                                                                                                                                                                                                                                                                    | reflections to be merged                                                                         |                           |               |
|                                   | 5502                                                                                                                                                                                                                                                                                                                                                                                                                                                                                                     | independent reflections                                                                          |                           |               |
|                                   | 0.033                                                                                                                                                                                                                                                                                                                                                                                                                                                                                                    | $R_{\text{int}}$ : (basis $F_o^2$ )                                                              |                           |               |
|                                   | 5502                                                                                                                                                                                                                                                                                                                                                                                                                                                                                                     | independent reflections (all) were used in refinements                                           |                           |               |
|                                   | 5056                                                                                                                                                                                                                                                                                                                                                                                                                                                                                                     | independent reflections with $I_o > 2\sigma(I_o)$                                                |                           |               |
|                                   | 99.3 %                                                                                                                                                                                                                                                                                                                                                                                                                                                                                                   | completeness of the data set                                                                     |                           |               |
|                                   | 400                                                                                                                                                                                                                                                                                                                                                                                                                                                                                                      | parameter full-matrix refinement                                                                 |                           |               |
|                                   | 13.8                                                                                                                                                                                                                                                                                                                                                                                                                                                                                                     | reflections per parameter                                                                        |                           |               |
| Solution:                         | Direct Methods [3, 7]; Difference Fourier syntheses                                                                                                                                                                                                                                                                                                                                                                                                                                                      |                                                                                                  |                           |               |
| Refinement Parameters:            | In the asymmetric unit:                                                                                                                                                                                                                                                                                                                                                                                                                                                                                  |                                                                                                  |                           |               |
|                                   | 44                                                                                                                                                                                                                                                                                                                                                                                                                                                                                                       | Non-hydrogen atoms with anisotropic displacement parameters                                      |                           |               |
| Hydrogen Atoms:                   | In the difference map(s) calculated from the model containing all non-hydrogen atoms, not all of the hydrogen positions could be determined from the highest peaks. For this reason, the hydrogen atoms were placed in calculated positions ( $d_{\text{C-H}} = 0.95, 0.98 \text{ Å}$ ). Isotropic displacement parameters were calculated from the parent carbon atom ( $U_{\text{H}} = 1.2/1.5 U_{\text{C}}$ ). The hydrogen atoms were included in the structure factor calculations but not refined. |                                                                                                  |                           |               |
| Atomic Form Factors:              | For neutral atoms and anomalous dispersion [4, 5, 7]                                                                                                                                                                                                                                                                                                                                                                                                                                                     |                                                                                                  |                           |               |
| Extinction Correction:            | no                                                                                                                                                                                                                                                                                                                                                                                                                                                                                                       |                                                                                                  |                           |               |
| Weighting Scheme:                 | $w^{-1} = \sigma^2(F_o^2) + (a*P)^2 + b*P$<br>with a: 0.0165; b: 5.0754; P: [Maximum(0 or $F_o^2$ ) + $2*F_c^2$ ]/3                                                                                                                                                                                                                                                                                                                                                                                      |                                                                                                  |                           |               |
| Shift/Err:                        | Less than 0.001 in the last cycle of refinement:                                                                                                                                                                                                                                                                                                                                                                                                                                                         |                                                                                                  |                           |               |
| Resid. Electron Density:          | +0.60 eError!/Å <sup>3</sup> ; -0.92 eError!/Å <sup>3</sup>                                                                                                                                                                                                                                                                                                                                                                                                                                              |                                                                                                  |                           |               |
| R1:                               | $\Sigma( F_o  -  F_c )/\Sigma F_o $                                                                                                                                                                                                                                                                                                                                                                                                                                                                      |                                                                                                  |                           |               |
| [ $F_o > 4\sigma(F_o)$ ; N=5056]: |                                                                                                                                                                                                                                                                                                                                                                                                                                                                                                          |                                                                                                  |                           | = 0.0204      |
| [all reflctns; N=5502]:           |                                                                                                                                                                                                                                                                                                                                                                                                                                                                                                          |                                                                                                  |                           | = 0.0241      |
| wR2:                              | $[\Sigma w(F_o^2 - F_c^2)^2 / \Sigma w(F_o^2)^2]^{1/2}$                                                                                                                                                                                                                                                                                                                                                                                                                                                  |                                                                                                  |                           |               |
| [ $F_o > 4\sigma(F_o)$ ; N=5056]: |                                                                                                                                                                                                                                                                                                                                                                                                                                                                                                          |                                                                                                  |                           | = 0.0446      |
| [all reflctns; N=5502]:           |                                                                                                                                                                                                                                                                                                                                                                                                                                                                                                          |                                                                                                  |                           | = 0.0458      |

Goodness of fit:  $[\sum w(F_o^2 - F_c^2)^2 / (\text{NO-NV})]^{1/2} = 1.137$

Remarks: Refinement expression  $\sum w(F_o^2 - F_c^2)$

## 2. Irradiation Setup

TUM LED setup:

I=const

-> constant light output

- Power Supply 220 - 240V / 50Hz
- 8 LEDs (K2 Luxeon high power LED's), independently switch- and tunable (see also Table S1)
- Air cooling system
- Irradiation power tunable via current

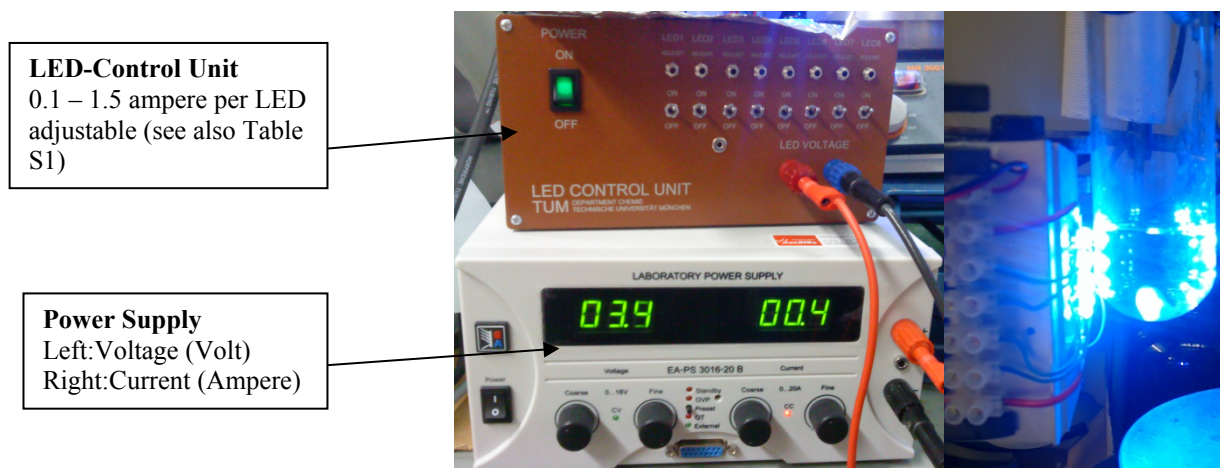

**Fig. S2:** LED-setup.

**Actinometry**<sup>[8-10]</sup>:

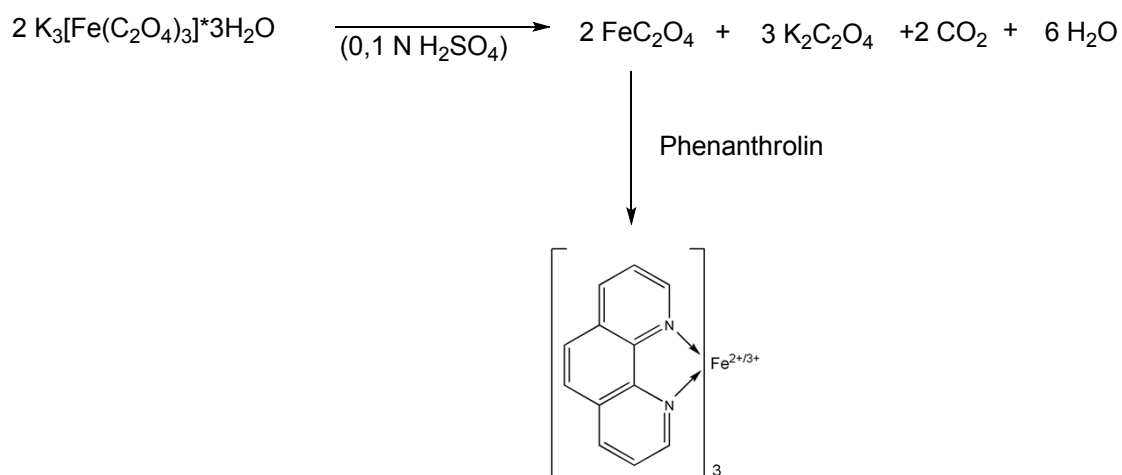

**Scheme S1:** Photolytic Reduction of Fe(III) to Fe(II).

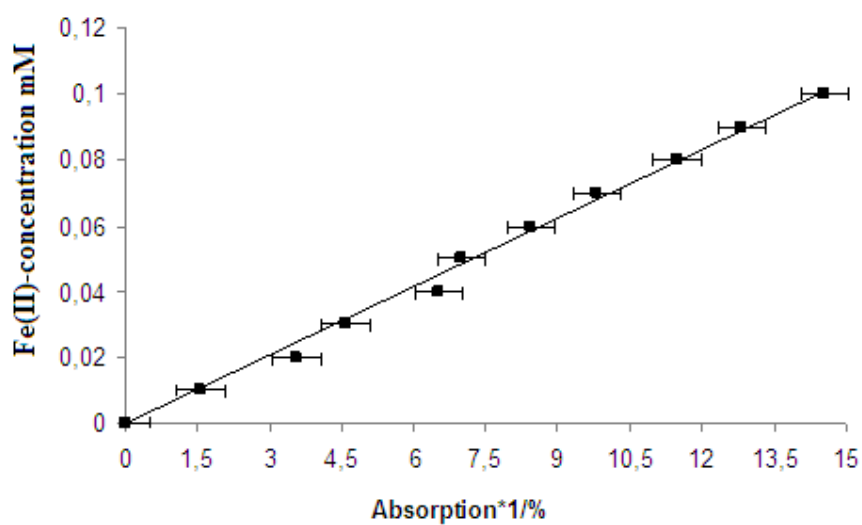

**Fig. S3:** Calibration curve for the actinometry.

**Table S1:** Light intensity for one LED depending on the power supply (current).

| Current [A] | Absorption [%] | Concentration Fe(II) [ $\mu\text{mol/l}$ ] | m Fe(II) [ $\mu\text{mol}$ ] | Quants/sec [ $10^{16}/\text{s}$ ] |
|-------------|----------------|--------------------------------------------|------------------------------|-----------------------------------|
| 0.1         | 1.11           | 7.67                                       | 0.614                        | 4.10                              |
| 0.2         | 1.39           | 9.61                                       | 0.769                        | 5.14                              |
| 0.3         | 1.74           | 12.0                                       | 0.962                        | 6.43                              |
| 0.4         | 2.51           | 17.4                                       | 1.39                         | 9.28                              |
| 0.5         | 2.72           | 18.7                                       | 1.50                         | 10.0                              |
| 0.6         | 2.63           | 18.1                                       | 1.45                         | 9.72                              |
| 0.7         | 3.80           | 26.3                                       | 2.10                         | 14.1                              |
| 0.8         | 4.42           | 30.6                                       | 2.44                         | 16.3                              |
| 0.9         | 4.89           | 33.8                                       | 2.70                         | 18.1                              |
| 1.0         | 5.47           | 37.8                                       | 3.03                         | 20.2                              |
| 1.1         | 5.97           | 41.3                                       | 3.30                         | 22.1                              |
| 1.2         | 6.52           | 45.1                                       | 3.60                         | 24.1                              |
| 1.3         | 7.06           | 48.8                                       | 3.90                         | 26.1                              |
| 1.4         | 7.60           | 52.6                                       | 4.20                         | 28.1                              |
| 1.5         | 8.15           | 56.3                                       | 4.51                         | 30.1                              |

**References:**

- [1] APEX suite of crystallographic software. APEX 2 Version 2008.4. Bruker AXS Inc., Madison, Wisconsin, USA (2008).
- [2] SAINT, Version 7.56a and SADABS Version 2008/1. Bruker AXS Inc., Madison, Wisconsin, USA (2008).
- [3] Altomare, A.; Cascarano, G.; Giacovazzo, C.; Guagliardi, A.; Burla, M. C.; Polidori, G.; Camalli M. "**SIR92**", *J. Appl. Cryst.* **1994**, 27, 435-436.
- [4] International Tables for Crystallography, Vol. C, Tables 6.1.1.4 (pp. 500-502), 4.2.6.8 (pp. 219-222), and 4.2.4.2 (pp. 193-199), Wilson, A. J. C., Ed., Kluwer Academic Publishers, Dordrecht, The Netherlands, 1992.
- [5] Sheldrick, G. M. "**SHELXL-97**", University of Göttingen, Göttingen, Germany, (1998).
- [6] Spek, A. L. "**PLATON**", A Multipurpose Crystallographic Tool, Utrecht University, Utrecht, The Netherlands, (2010).
- [7] L. J. Farrugia, "**WinGX** (Version 1.70.01 January 2005) ", *J. Appl. Cryst.* **1999**, 32, 837-838.
- [8] J. H. Baxendale et al, *J. Phys. Chem.*, **1955**, 59, 783–788
- [9] H. J. Kuhn et al, *Pure Appl. Chem.*, **2004**, 12, 2105–2146
- [10] W. Wendland et al, *J. Inorg. Nucl. Chem.*, **1966**, 28, 2420
